# Supplementary material for: Microemulsion and Sol-Gel Synthesized ZrO2-MgO Catalysts for the Liquid-Phase Dehydration of Xylose to Furfural
Source: MDPI journal article supplement (doi:10.3390/molecules22122257), 2017-12-18
Supplement: s1 [file s1]

Article

# Microemulsion and sol-gel synthesized $\text{ZrO}_2\text{-MgO}$ catalysts for the liquid-phase dehydration of xylose to furfural

Almudena Parejas<sup>1</sup>, Vicente Montes<sup>1</sup>, Jesús Hidalgo<sup>1</sup>, Elena Sánchez<sup>1</sup>, Alberto Marinas<sup>1</sup> and Francisco J. Urbano<sup>1,\*</sup>

<sup>1</sup> Departamento de Química Orgánica, Instituto Universitario de Investigación en Química Fina y Nanoquímica IUIQFN, Universidad de Córdoba, Campus de Rabanales, Edificio Marie Curie, E-14014 Córdoba, España

\* Correspondence: fj.urbano@uco.es; Tel.: +34-957-218-638

Academic Editor: name

Received: date; Accepted: date; Published: date

**Supplementary Materials:** The following are available online at [www.mdpi.com/link](http://www.mdpi.com/link).

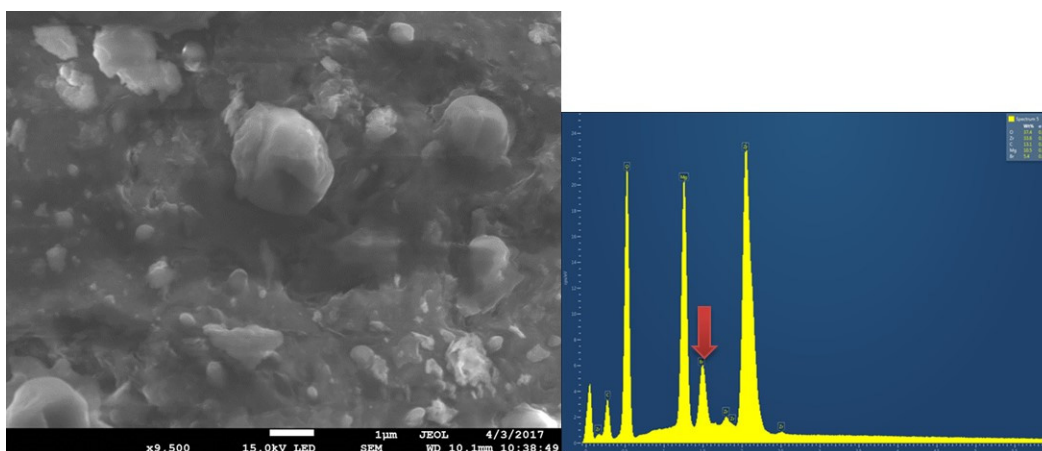

**Supplementary Figure S1:** SEM-EDX measurements for the MgZr-ME catalysts, including EDX profiles for the whole image area. Red arrow marks Br signal (2.1% atomic).

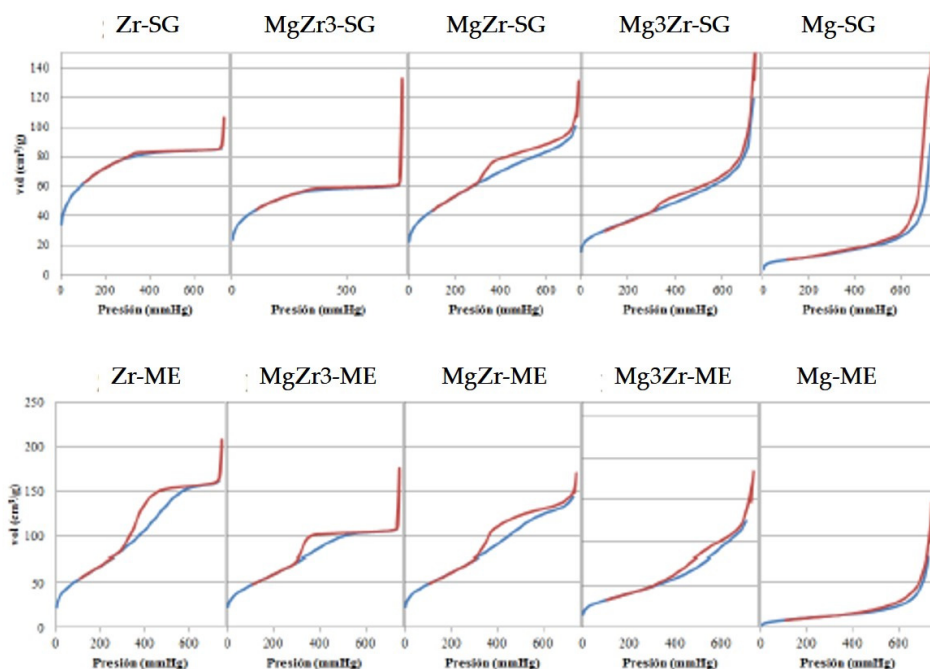

**Supplementary Figure S2:** Nitrogen adsorption-desorption isotherms corresponding to the solids of both SG and ME series.

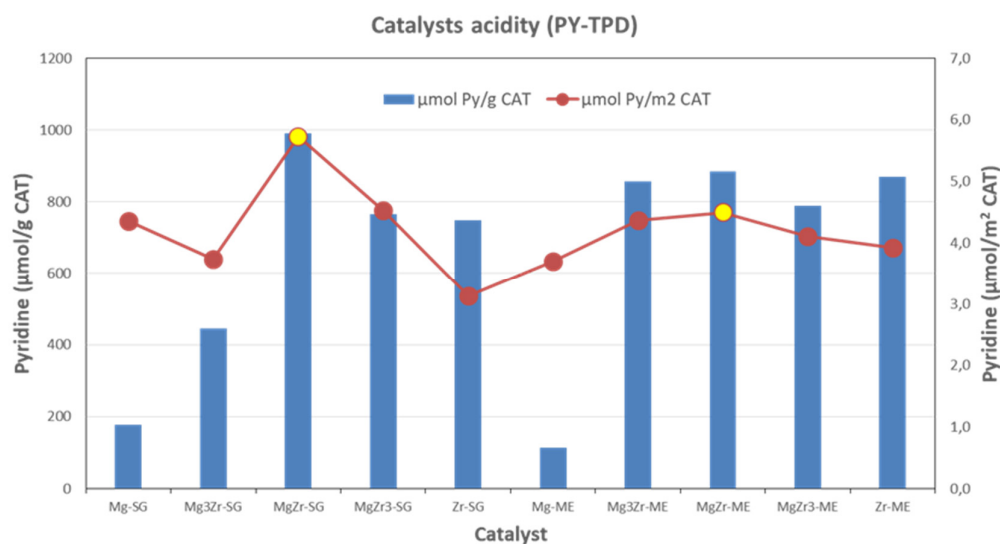

**Supplementary Figure S3:** Catalysts acidity determined from temperature programmed desorption of pre-adsorbed pyridine ( $\mu\text{mol PY/g CAT}$  and  $\mu\text{mol PY/m}^2 \text{CAT}$ ).

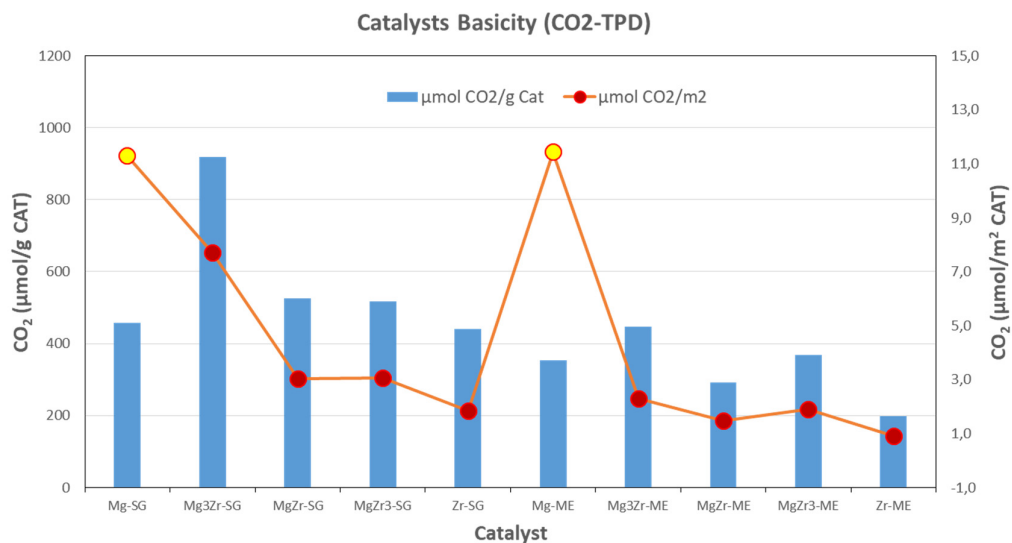

**Supplementary Figure S4:** Catalysts basicity determined from temperature programmed desorption of pre-adsorbed carbon dioxide ( $\mu\text{mol CO}_2/\text{g}$  and  $\mu\text{mol CO}_2/\text{m}^2$ ).

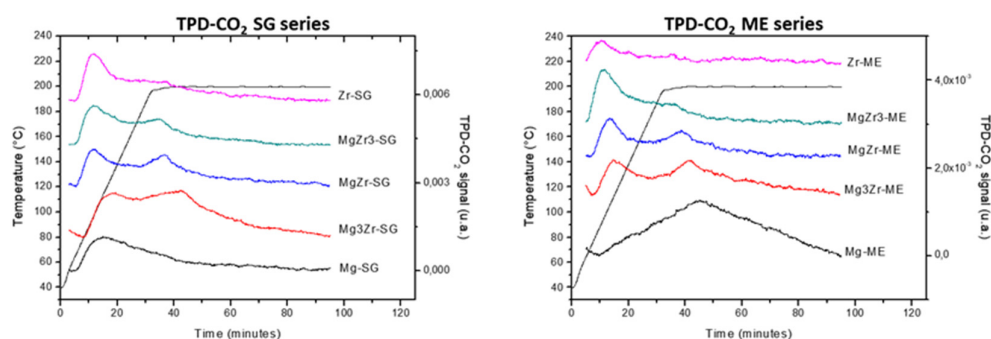

**Supplementary Figure S5:** Temperature-programmed desorption profiles of pre-adsorbed carbon dioxide obtained for the catalysts synthesized in this work.
